# Supplementary material
Source: Springer Nature journal article supplement (https://www.springermedizin.de/resource/supplementary/12967_2013_1584_MOESM1_ESM.pdf/9574390)

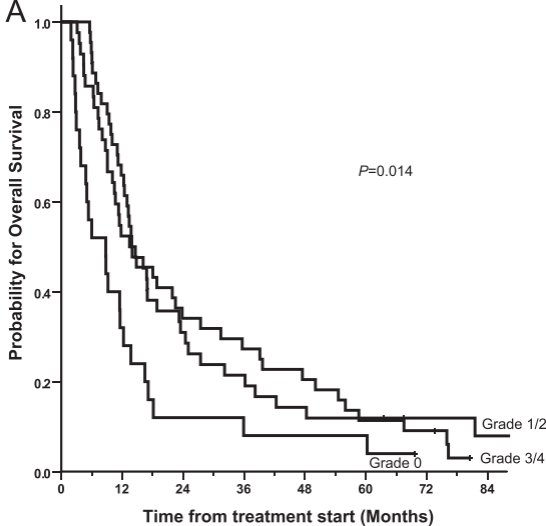

No. at risk

|           |    |    |    |    |   |   |   |   |
|-----------|----|----|----|----|---|---|---|---|
| Grade 3/4 | 44 | 29 | 15 | 12 | 9 | 5 | 4 | 0 |
| Grade 1/2 | 42 | 22 | 13 | 9  | 6 | 5 | 3 | 2 |
| Grade 0   | 25 | 8  | 3  | 2  | 2 | 2 | 0 | 0 |

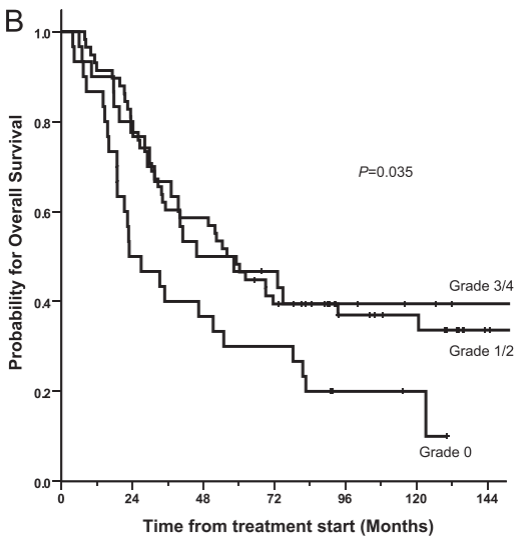

No. at risk

|           |    |    |    |    |    |    |   |
|-----------|----|----|----|----|----|----|---|
| Grade 3/4 | 30 | 24 | 15 | 13 | 6  | 4  | 1 |
| Grade 1/2 | 58 | 45 | 34 | 22 | 14 | 11 | 3 |
| Grade 0   | 30 | 15 | 11 | 9  | 3  | 2  | 0 |

Supplement: MOESM1 [file 9574390]
